# Supplementary material for: The Biflavonoid Isoginkgetin Is a General Inhibitor of Pre-mRNA Splicing
Source: PubMed Central journal article supplement — J Biol Chem. 2008 Nov 28;283(48):33147–54. doi: 10.1074/jbc.M805556200 (PMC2586251; doi:10.1074/jbc.m805556200), 2008-11-28
Supplement: M805556200_1.pdf [file M805556200_1.pdf]

**Supplementary Table 1.** Sequences of oligonucleotides used in RT-PCR analysis.

| <b>Primer Name</b>                       | <b>Sequence (5' to 3')</b>          |
|------------------------------------------|-------------------------------------|
| Reporter exon 1 Forward (F)              | TAA ACT TAA GCT TCA GCG CCT CGG     |
| Reporter exon 2 Reverse (R)              | TAG CGC TTC ATG GCT TTG TGC AG      |
| Reporter intron F (pre-mRNA)             | AGG TGG AGT GGG CTG AGG             |
| Reporter exon luc2 R (pre-mRNA)          | GGC CCT TCT TAA TGT TTT TGG         |
| U6 F                                     | CGC TTC GGC AGC ACA TAT AC          |
| U6 R                                     | GAA TTT GCG TGT CAT CCT TG          |
| $\beta$ -tubulin intron 2 F <sup>1</sup> | CTA TAA ACC TTC CCT TCT GCC AG      |
| $\beta$ -tubulin exon 4 R <sup>1</sup>   | CAG GGT ATT CTT CTC GCA TCT TGC TG  |
| Actin exon 3 F <sup>1</sup>              | GGT GGG CAT GGG TCA GAA GGA T       |
| Actin intron 4 R <sup>1</sup>            | GGA AAT GAG GGC AGG ACT TAG CTT     |
| DNAJB1 intron 2 F <sup>2</sup>           | GGC CTG ATG GGT CTT ATC TAT GG      |
| DNAJB1 exon 3 R <sup>2</sup>             | AAT GAG GTC CCC ACG TTT CTC GGG TGT |
| TPI exon 2 F                             | AGT GAC TAA TGG GGC TTT TAC TGG     |
| TPI intron 2 R                           | TAA AGG AAG AGA TGA AGC CAA GG      |
| TPI exon 3 F                             | AGA GAG AAG GCA TGT CTT TGG         |
| TPI intron 3 R                           | GAA ACA GAC TTG GTG AGA CAT CC      |
| TPI intron 6 F                           | GAG TGG GCT GAG GAC TAG ACT G       |
| TPI exon 7 R                             | AGG GTA GGG AAG ATG GAT GG          |
| NOL1 exon 7 F                            | GGA GGA AGA GAA AGA AGT GAC C       |
| NOL1 intron 7R                           | AAG GAA CTG TGT CAT GAT GTC C       |

<sup>1</sup>Kaida *et al.*, (2007) Nat Chem Biol 3:576-583.

<sup>2</sup>Kotake *et al.*, (2007) Nat Chem Biol 3:570-575.
